# Supplementary material
Source: PubMed Central journal article supplement (PMC3338340)
Supplement: mmc3.pdf [file mmc3.pdf]

**Wild-type**



**TLR9<sup>-/-</sup>**
