# Supplementary material
Source: PubMed Central journal article supplement (PMC3338340)

**A****Retinal Neutrophils**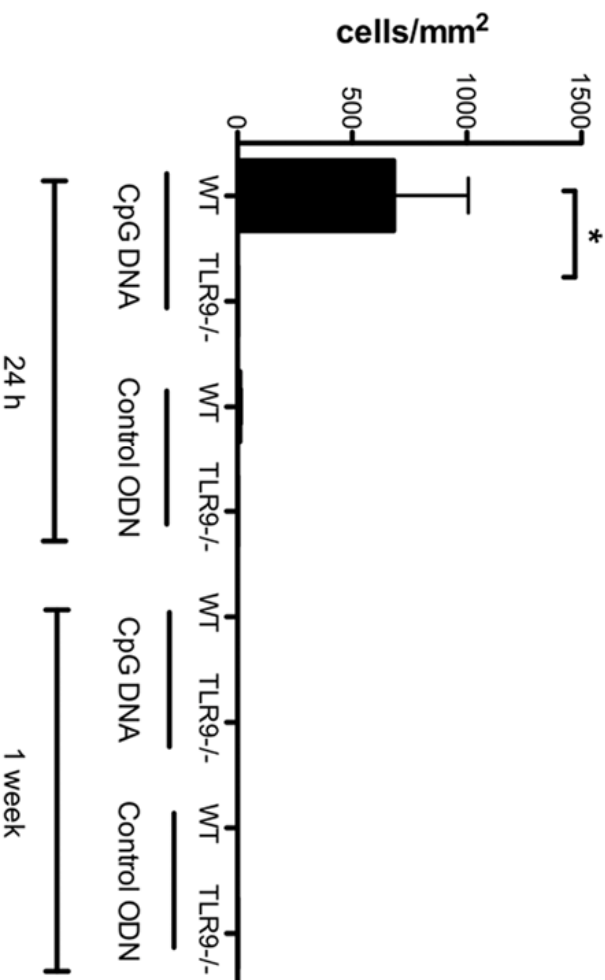**B**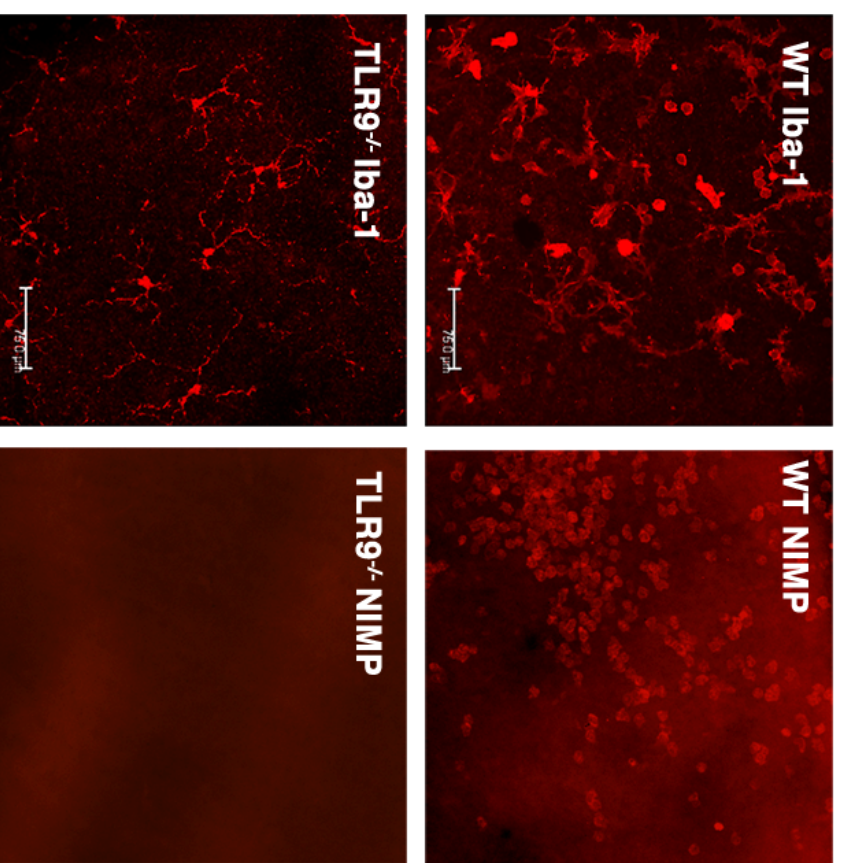**C****Retinal Neutrophils**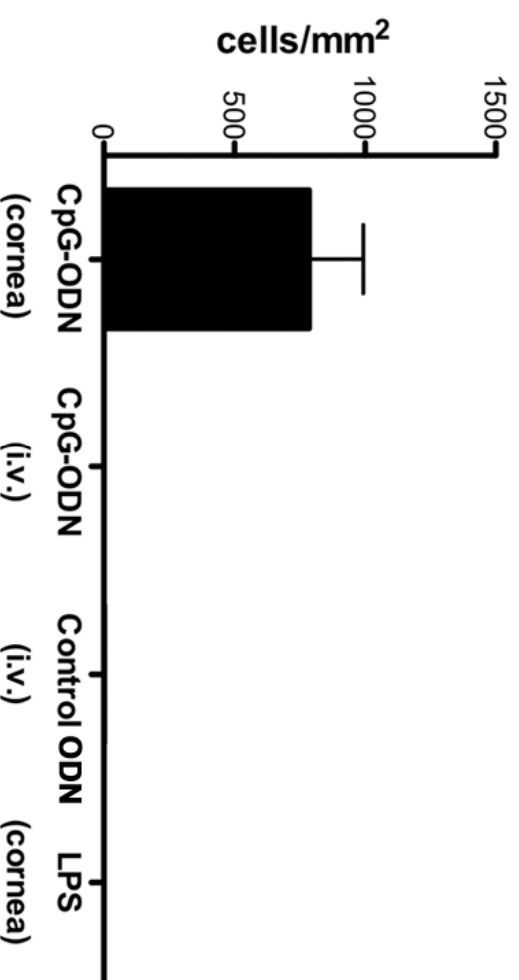**D****CpG-ODN treated eye**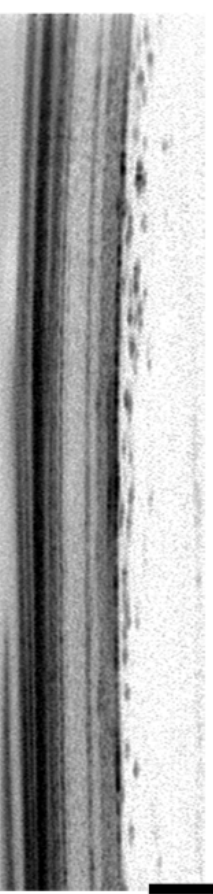**E****Naive contralateral eye**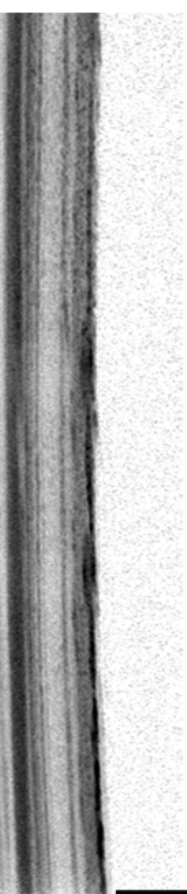

Supplement: mmc1.pdf [file mmc1.pdf]
